# Supplementary material for: Extreme heterogeneity of influenza virus infection in single cells
Source: eLife journal article supplement (doi:10.7554/elife.32303), 2018-02-16
Supplement: supp [file elife-32303-supp-v1.zip]

cumulative fraction flu mRNA

10hr (Gini coeff 0.64)

6hr (Gini coeff 0.75)

8hr (Gini coeff 0.76)

8hr-2 (Gini coeff 0.81)

1.00  
0.75  
0.50  
0.25  
0.00

0

0.5

1

0

0.5

1

0

0.5

1

0

0.5

1

fraction of infected cells in sample
