# Supplementary material for: Extreme heterogeneity of influenza virus infection in single cells
Source: eLife journal article supplement (doi:10.7554/elife.32303), 2018-02-16
Supplement: supp [file elife-32303-supp-v1.zip]

| Category                                    | Genes                                                   |
|---------------------------------------------|---------------------------------------------------------|
| Detoxification                              | AKR1C3, AKR1B10, ALDH3A1,<br>ALDH1A1, NQO1, CBR1, PRDX1 |
| Protein folding                             | TXN, PPIA                                               |
| Electron transport chain                    | NDUFB4, MT-CO1, MT-CO3                                  |
| Regulators                                  | ATF3, GADD45B                                           |
| ROS-responsive<br>relevance complex/unknown | UBB, NME1                                               |
