# Supplementary figures and images for: Extreme heterogeneity of influenza virus infection in single cells
Source: eLife journal article supplement (doi:10.7554/elife.32303), 2018-02-16

## Excluding known co-infected cells

cell has gene: ■ no ■ yes

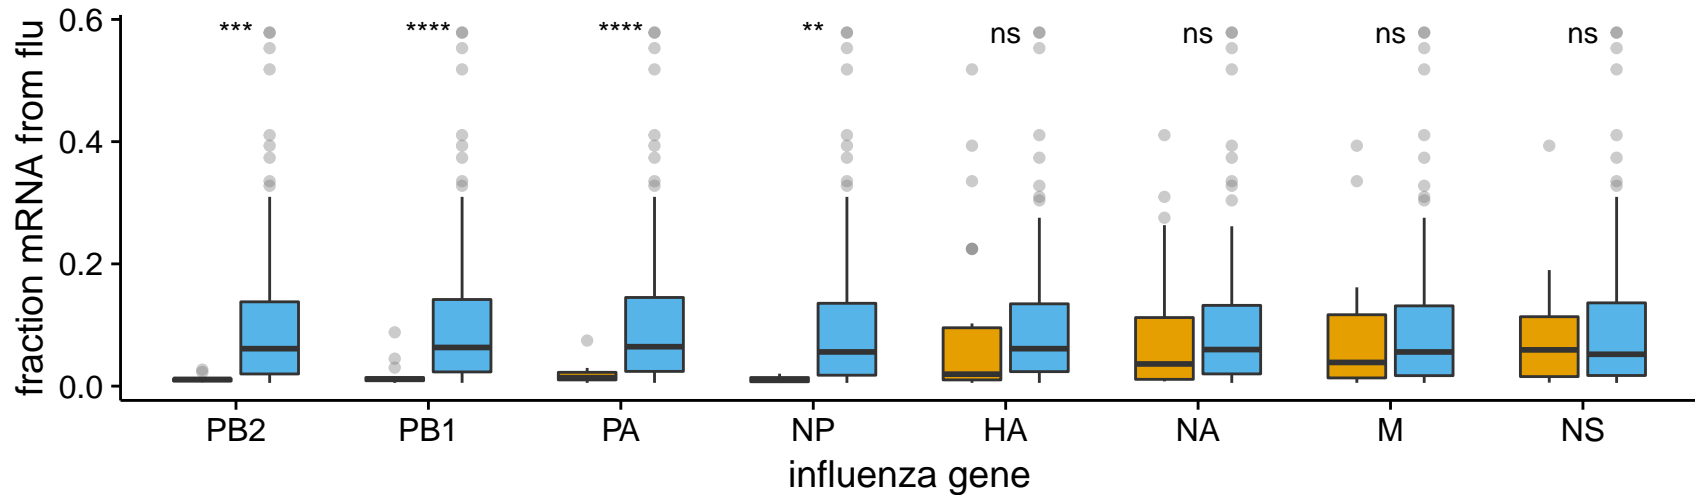

Supplement: supp [file elife-32303-supp-v1.zip]

**A****10hr**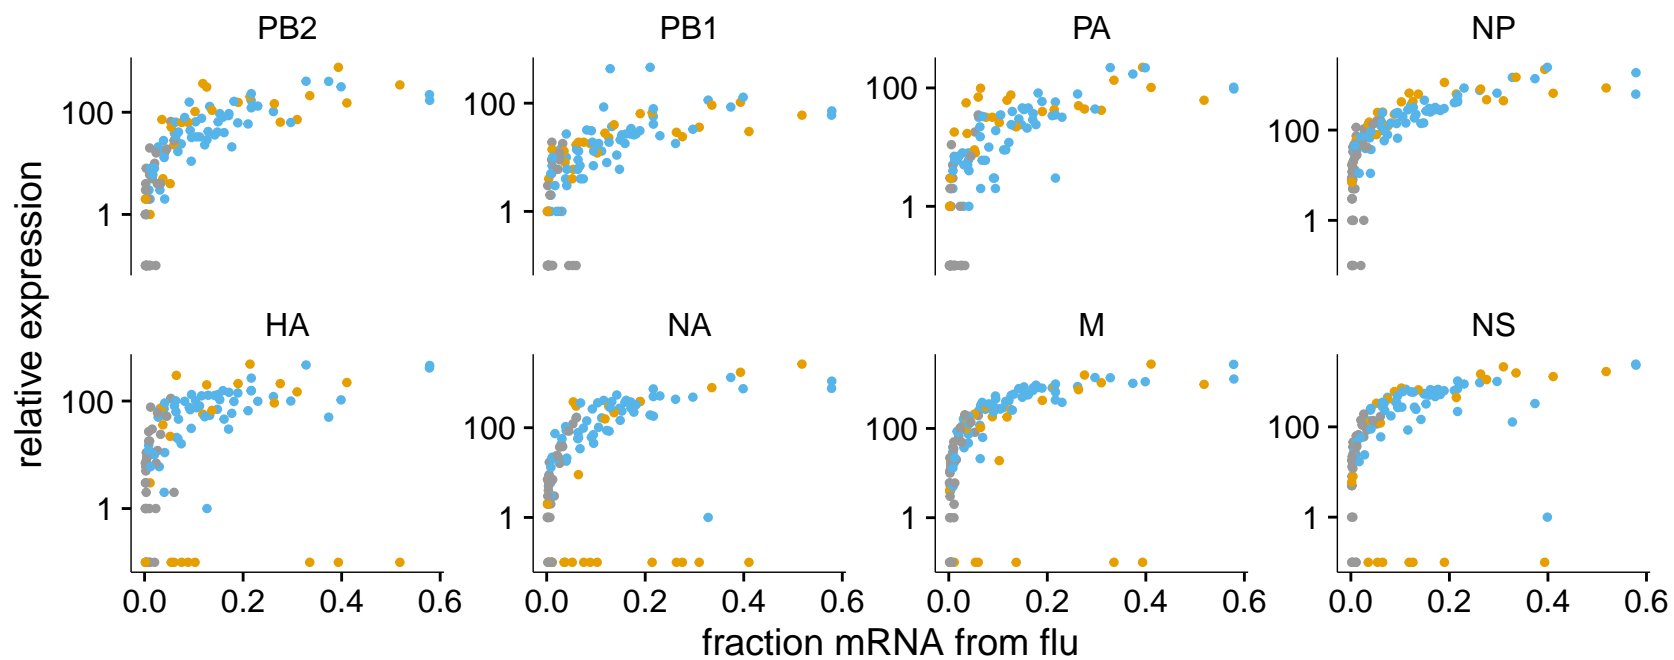**B****8hr-2**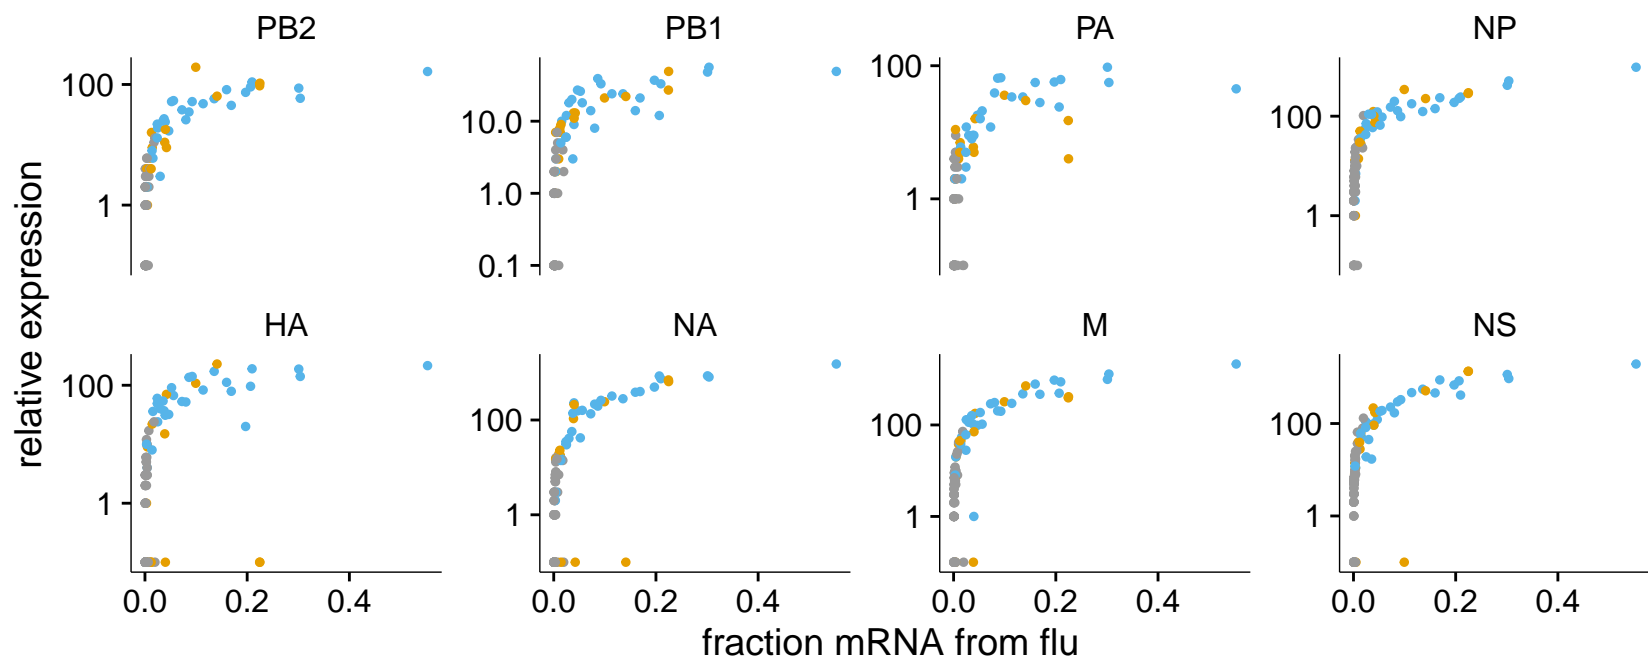**C****8hr**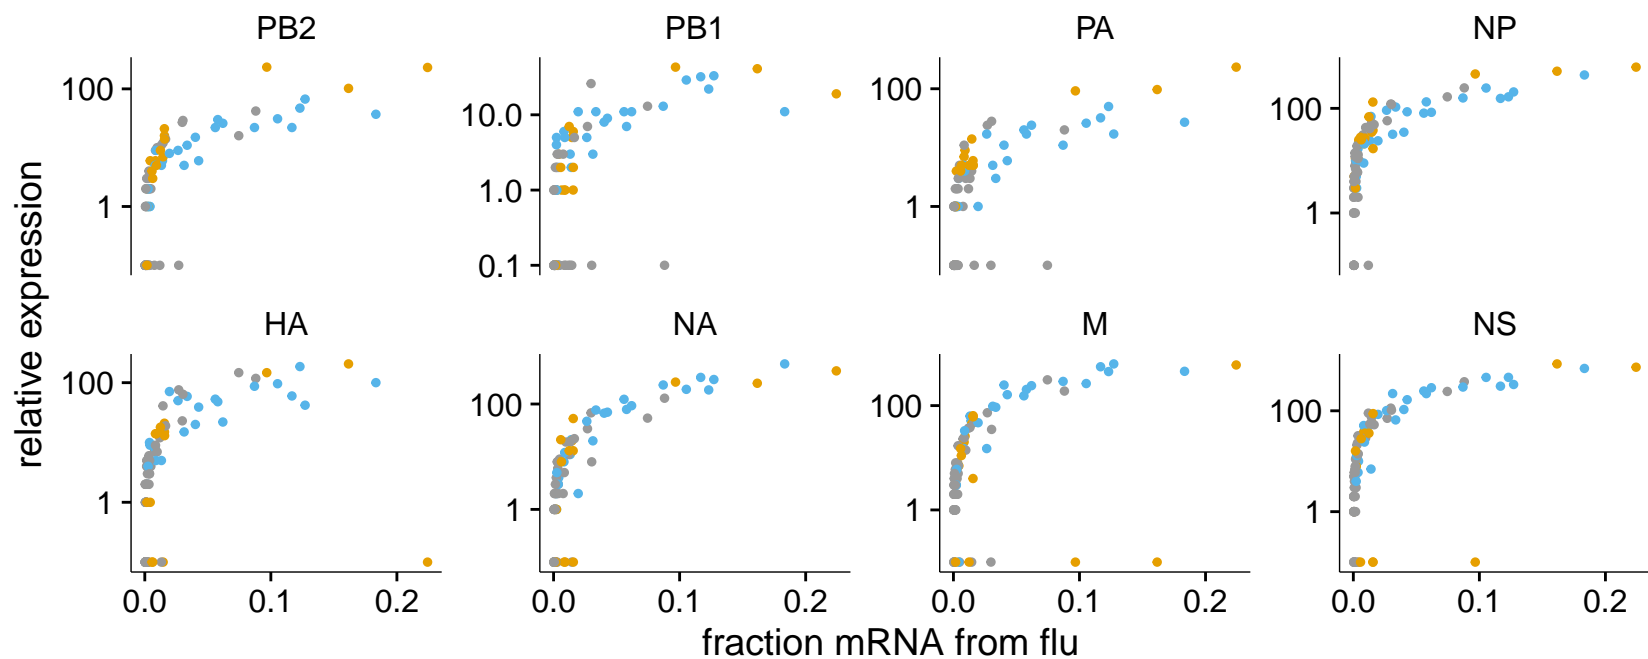

Supplement: supp [file elife-32303-supp-v1.zip]

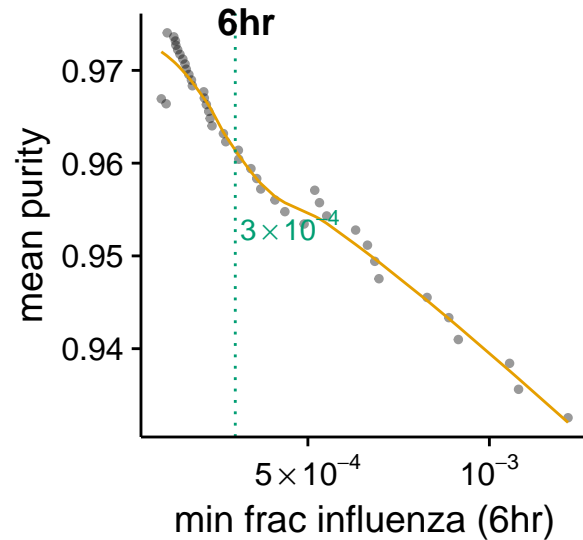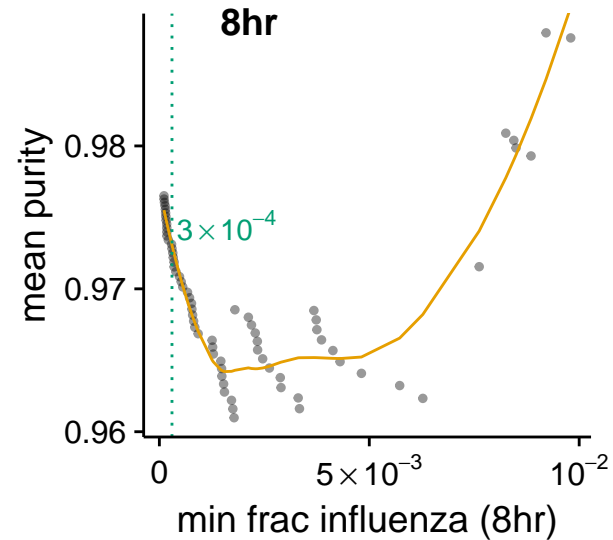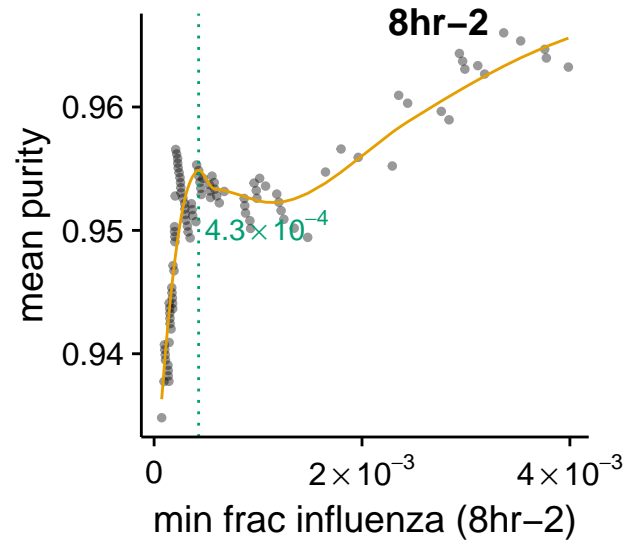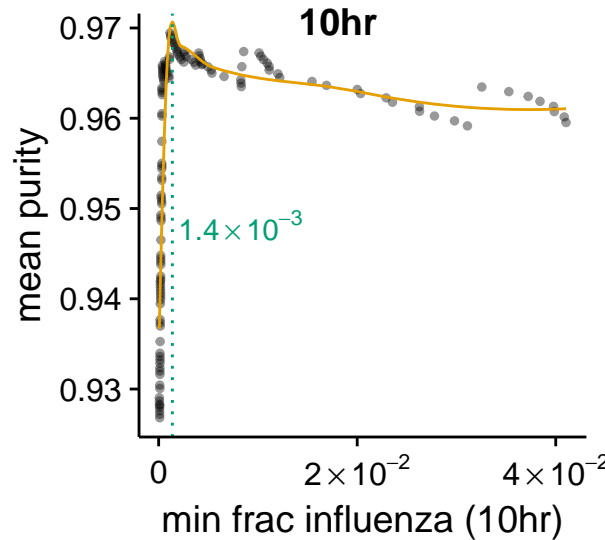

Supplement: supp [file elife-32303-supp-v1.zip]

# 10hr sample only

cell has gene: ■ no ■ yes

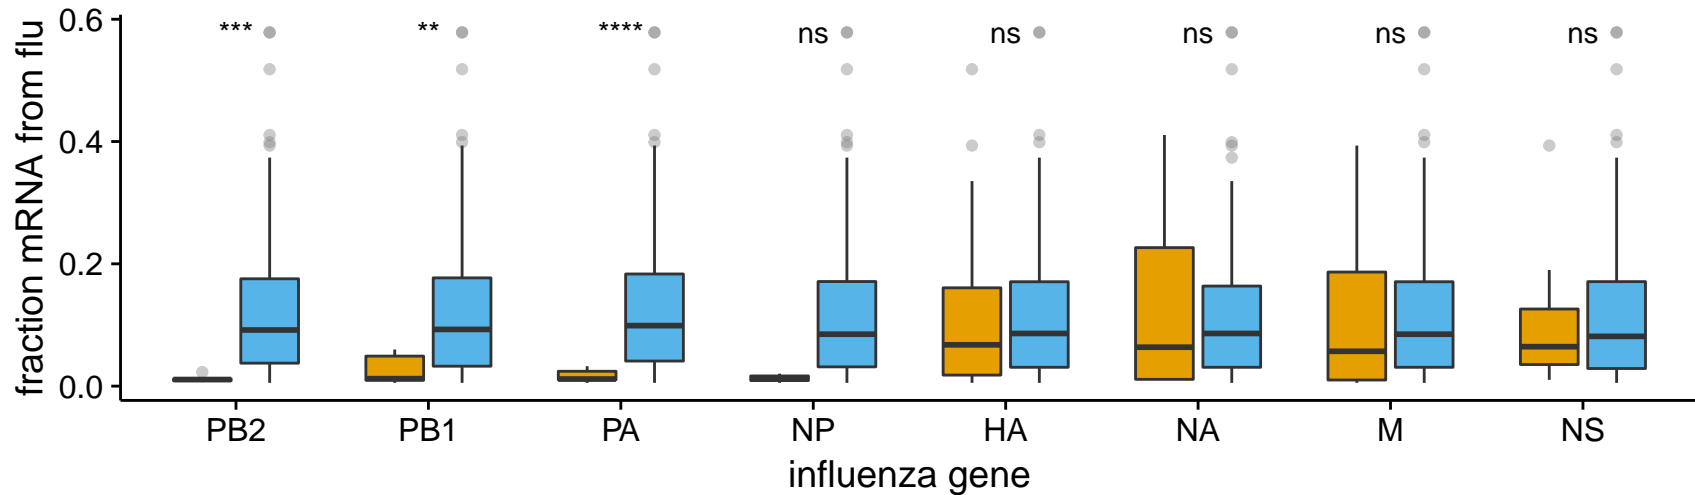

Supplement: supp [file elife-32303-supp-v1.zip]

fraction mRNA from flu: • lacks RNP gene • lacks other gene • all 8 genes

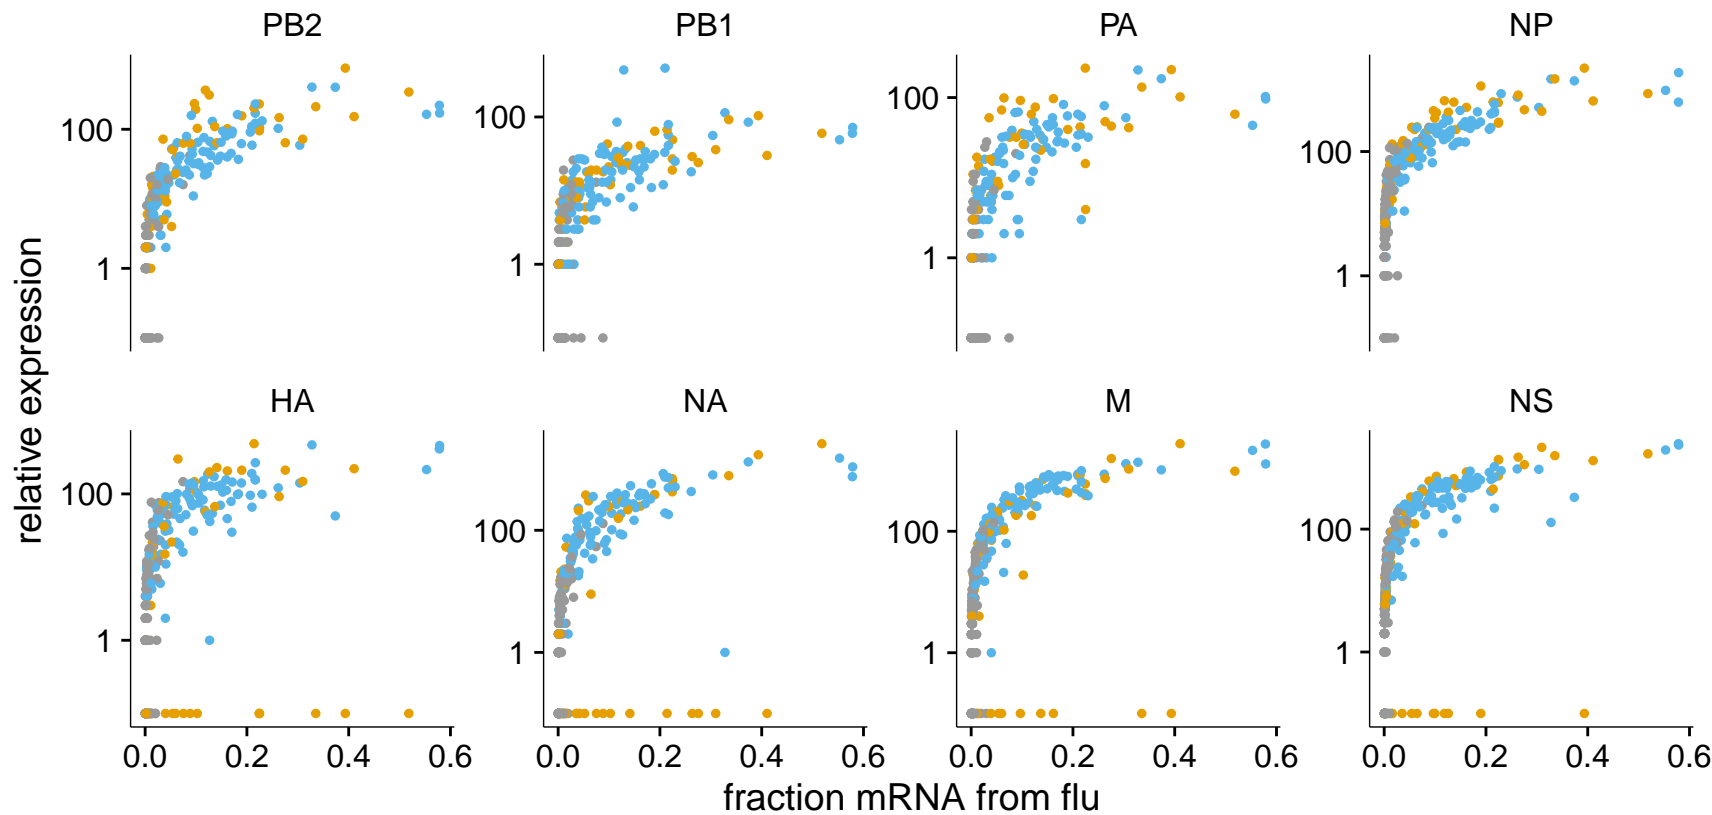

Supplement: supp [file elife-32303-supp-v1.zip]

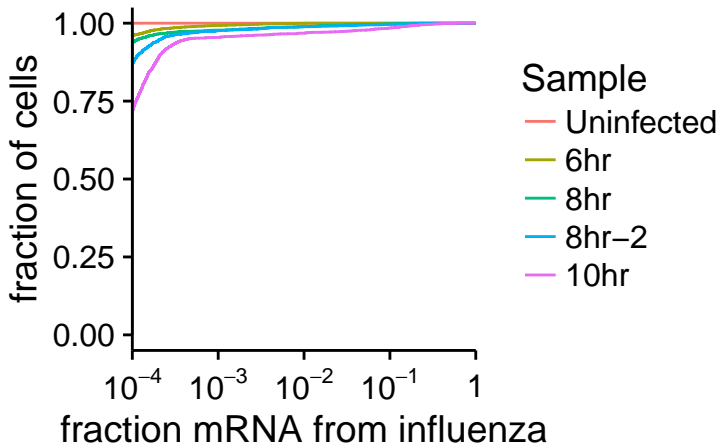

Supplement: supp [file elife-32303-supp-v1.zip]

Secondary/Primary Transcription

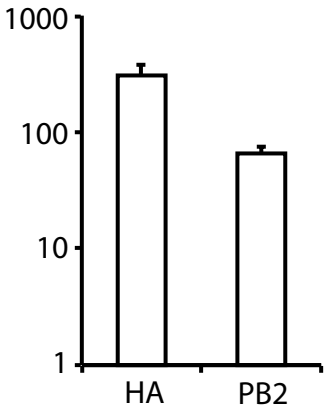

Supplement: supp [file elife-32303-supp-v1.zip]
